# Supplementary material
Source: publisher figshare collection journal article supplement (https://karger.figshare.com/articles/dataset/_/7028171)
Supplement: Supplementary file 1 [file 1]

Supplemental Material for the Manuscript:

## The effects of endurance exercise and diet on atherosclerosis in young and aged ApoE<sup>-/-</sup> and WT mice

Bojana Jakic<sup>1</sup>, Mattias Carlsson<sup>1</sup>, Maja Buszko<sup>1</sup>, Giuseppe Cappellano<sup>1</sup>, Christian Ploner<sup>2</sup>, Elisabeth Onestingel<sup>1</sup>, Maria Foti<sup>3,4</sup>, Hubert Hackl<sup>5</sup>, Egon Demetz<sup>6</sup>, Hermann Dietrich<sup>7</sup>, Cecilia Wick<sup>1,8</sup>, Georg Wick<sup>1</sup>

<sup>1</sup>Laboratory of Autoimmunity, Division of Experimental Pathophysiology and Immunology, Biocenter, Medical University of Innsbruck, Innsbruck, Austria

<sup>2</sup>Department of Plastic, Reconstructive and Aesthetic Surgery, Medical University of Innsbruck, Innsbruck, Austria

<sup>3</sup>School of Medicine and Surgery, University of Milano-Bicocca, Monza, Italy

<sup>4</sup>Genopolis Consortium, University of Milano-Bicocca, Milan, Italy

<sup>5</sup>Division of Bioinformatics, Biocenter, Medical University of Innsbruck, Innsbruck, Austria

<sup>6</sup>Department of Internal Medicine II, Innsbruck University Hospital, Innsbruck, Austria

<sup>7</sup>Central Laboratory Animal Facility, Medical University of Innsbruck, Innsbruck, Austria

<sup>8</sup>Unit of Rheumatology, Department of Medicine, Karolinska Institutet, Karolinska University Hospital, Solna, Stockholm, Sweden

Word count without references: 1415; with references: 1790; references: 15

Corresponding author:

Bojana Jakic, PhD

Laboratory of Autoimmunity,

Division of Experimental Pathophysiology

and Immunology, Biocenter

Peter Mayr Strasse 1A,

6020 Innsbruck, Austria

Tel: 0043 – (0)512 9003 70555

Email: [bojana.jakic@i-med.ac.at](mailto:bojana.jakic@i-med.ac.at)

## Materials and Methods

### Animals and exercise program

Female C57BL/6 wild-type (WT) and apolipoprotein E knock-out, on a C57BL/6 background, (ApoE<sup>-/-</sup>) mice were purchased from Charles River (Sulzfeld, Germany) and kept and bred under specific pathogen-free conditions at the Central Laboratory Animal Facility at the Medical University of Innsbruck on a 12-hour light/dark cycle with water and food *ad libitum*. The mice were put on a treadmill (Columbus Instruments, Columbus, OH, USA) exercise program at the age of 14 weeks (young) or 49-52 weeks (aged), which lasted for 5 weeks. The standard conventional chow diet (CD) was simultaneously changed to a high-cholesterol (21.2% fat) Western diet (WD) (Sniff GmbH, Soest, Germany) at the beginning of the experiment. 6 mice per group were used and control groups were sedentary mice on CD or WD. Two methods of calculation of sample size were used. To test the null hypothesis that plaque regression is estimated in 90% of exercised- and 10% of not exercised-mice, we used a software available online (<http://clincalc.com/stats/samplesize.aspx>). According to that, the software predicted that -at least- a sample size of 10 mice (5 mice/group) will have 80% power to detect a significant difference of atherosclerotic plaque reduction in exercised group in comparison with not exercised mice, using a two group t-test with a 0.05 two-sided significance level. Moreover, we also used a second method, called “resource equation method” and according to that, 6 mice for 4 groups could be considered as appropriate sample size [1]. The exercise program consisted of 1 hour of running at a speed of 16 meters per minute at a 5° uphill angle, for 5 days per week for 5 consecutive weeks (See Supplemental Video). The exercise program was designed based on previous studies showing reduced plaque formation and improved plaque stability after a 5-week treadmill intervention [2, 3]. 2 days after the last training, the mice were weighed and sacrificed by terminal CO<sub>2</sub> inhalation and with cervical dislocation. Blood, aorta, axillary, brachial and inguinal lymph nodes and the anterior tibialis muscles were collected for further processing. Animal experiments were approved by the National Animal Experimentation Committee (Ethical approval numbers BMWF-66.011/0099-II/10b/208 and the amendments BMWF-66.011/0115-II/10b/2009 and BMWF-66.011/0030-II/10b/2010).

### **En face plaque assessment**

The aortae were cleaned from fat and surrounding muscle tissue, cut longitudinally and stained with Sudan IV (Roth, Karlsruhe, Germany), for 15 minutes according to manufacturers instructions. Aortal plaques were photographed *en face* with ProgRes CapturePro 2.5 (JENOPTIK, Jena, Germany) with a fixed magnification and the total plaque area was calculated using ImageJ (Version 1.43, NIH, USA), by manually selecting the area of the total aorta and the areas where plaque was visible. The area of the selected region is then measured by ImageJ and given as units of pixels. Percentage of the aorta that is covered by plaque is calculated by dividing the total area of the plaques with the total area of the aorta. 6 aortas per group were analyzed.

### **T regulatory (T<sub>REG</sub>) cell flow cytometry**

Lymph node cells (pooled) from each group (n=6) were and stained for T<sub>REG</sub>s using the Mouse Regulatory T Cell Staining Kit #2 (eBioscience), according to manufacturer instructions, immediately after sacrifice. Briefly, the cells were stained with anti-mouse CD4 FITC, anti-mouse CD25 PE and anti-mouse CD8 PE-Cy7 antibodies (Biolegend), followed by permeabilization and staining with anti-mouse FoxP3 APC antibody (eBioscience). Samples were acquired using a FACS Calibur (BD) and analysed with the CellQuest software (BD).

### **Enzyme linked immunosorbent assay (ELISA) for anti-HSP60 antibodies and lipids**

Anti-HSP60 antibodies were analyzed in plasma samples, as described previously [4], with 6 samples per group being analyzed.

Serial dilutions of Precinorm L and Precinorm U (Roche Diagnostics, Indianapolis, IN, USA) of standards for the cholesterol and triglycerides, respectively, were prepared. Standards and plasma samples were mixed with Chol-Reagent (Roche) and incubated for 10 minutes. The samples were measured at OD<sub>459</sub> using the PowerWave XS (Bio-Tek, Winooski, VT, USA) and the results were analyzed with KC Junor Software (Bio-Tek). 6 samples per group were analyzed.

### **Luminex cytokine measurements**

93 Luminex panels for interleukin (IL)-1 $\beta$ , IL-6, IL-10, IL-17, interferon (IFN)- $\gamma$ , tumor  
94 necrosis factor (TNF)- $\alpha$  and transforming growth factor (TGF)- $\beta$ 1 (Bio-Rad, München,  
95 Germany) were used to measure plasma cytokine levels according to manufacturers  
96 instructions. Briefly, the plasma samples were added in duplicates, and bead  
97 standards were added in four-fold serial dilutions on 96-well filter plates. Thereafter,  
98 the samples were incubated with a detection antibody followed by streptavidin-PE.  
99 After washing, the samples were measured on the Bio-Plex 200 System (Bio-Rad). 3  
100 samples per group were analyzed. Results are presented as pg/ml.

### 101 **RNA isolation and cDNA preparation**

102 Total RNA was extracted from the tibialis anterior muscles from 3 mice per group  
103 following the double extraction protocol: RNA isolation by acid guanidinium  
104 thiocyanate-phenol-chloroform extraction (Trizol, Invitrogen) followed by a RNeasy  
105 clean-up procedure (Qiagen). RNA concentration and purity were assessed in a  
106 spectrophotometer (Nanodrop) and A<sub>260/280</sub> and A<sub>260/230</sub> ratios were determined. The  
107 integrity of the RNA was assessed by the Agilent Bioanalyzer (Agilent Technologies).  
108 For the reverse transcription reaction, 0.1 $\mu$ g of total RNA for each sample was used,  
109 using the WT expression kit (Ambion) starting with the T7 promoter-tailed random  
110 hexamers. cRNA was synthesized using a T7 polymerase catalyzed reaction containing  
111 unmodified ribonucleoside triphosphates. Single cDNA was synthesized from the  
112 cRNA template using random primers and dNTPs. The cRNA was hydrolyzed by RNase  
113 H and the single-stranded cDNA was purified. Fragmentation of the single-stranded  
114 cDNA was done with endonuclease I at uracil-containing positions. The fragmented  
115 cDNA is end-labeled with a biotinylated nucleotide analog.

### 116 **Microarray expression profiling**

117 Three independent microarray analyses were performed for each group of samples.  
118 Total RNA was processed for the use on mouse GeneChip® Gene 1.1 ST Array Strip  
119 (Affymetrix, Santa Clara, CA, USA) containing 700.000 murine probe sets which  
120 interrogates 29.000 transcripts. Sequences used in the design of the array were  
121 selected from GenBank®, dbEST and RefSeq. The fragmented cDNA was added to a  
122 hybridization solution and incubated to a microarray chip overnight at 45°C. The chips

were then transferred to a fluidics instrument to wash away unhybridized cDNA. Bound cDNA was then labeled with phycoerythrin-conjugated streptavidin (SAPE). Additional flours were then added using a biotinylated anti-streptavidin antibody and additional SAPE. The chip fluorescence was then measured using confocal laser scanning and the images were analyzed using the Affymetrix GCOD software version 1.4.

## **Analysis of microarray data**

Microarray data were analyzed using the R/Bioconductor statistical software environment [5]. Preprocessing and quantile normalization were done by the robust multi-array average method (RMA) [6]. Probesets were annotated following a recent Affymetrix annotation file and only probesets with mRNA Refseq annotation were considered. Differentially expressed genes (DEG) were identified by using linear models and the empirical Bayes methods in the package *limma* [7] and p-values were adjusted for multiple testing based on the false discovery rate according to the Benjamini-Hochberg method [8]. All of the 48 possible individual comparisons (4 factors age, genotype, exercise, diet with 2 levels each) were done and two-way analyses (exercise x diet) were performed on the 4 experimental conditions young/wt, young/ApoE<sup>-/-</sup>, old/wt, old/ApoE<sup>-/-</sup>. Genes were considered differentially expressed with adjusted P-values <0.05 and >1.3 fold change (or where stated >2 fold change). Gene ontology (GO) and pathway analyses for differentially expressed genes were performed using DAVID [9, 10]. Hierarchical clustering and heat map visualization were done using Genesis [11]. Accession number: E-MTAB-5685.

## **Quantitative RT-PCR (qPCR)**

The qPCR reactions were performed using the SsoAdvanced™ Universal SYBR® Green Supermix kit (Biorad, Germany) in a CFX96 (Biorad, Germany) using following protocol: 95°C for 2 min, 40 cycles of 95°C (15s), 60°C (15s), and 72°C (10s). Gene expression was determined by using the Bio-Rad CFX Manager 3.1 software and CT values were normalized to the expression of the Hypoxanthin-Guanin-Phosphoribosyltransferase gene (HPRT). Referenced and newly designed primers used in this study were

153 synthesized by Microsynth Austria (Table 1) and specificity was tested by the  
 154 assessment of the melting curve. 3 mice per group were used.  
 155

| Gene                          | Sense primer                 | Antisense primer                     |
|-------------------------------|------------------------------|--------------------------------------|
| mouse PGC-1a1 <sup>[12]</sup> | 5'-GGACATGTGCAGCCAAGACTCT-3' | 5'-CACTTCAATCCACCCAGAAAGCT-3'        |
| mouse PGC-1a2 <sup>[12]</sup> | 5'-CCACCAGAATGAGTGACATGGA-3' | 5'-GTTTCAGCAAGATCTGGGCAAA-3'         |
| mouse PGC-1a3 <sup>[12]</sup> | 5'-AAGTGAGTAACCGGAGGCATTC-3' | 5'-TTCAGGAAGATCTGGGCAAAAGA-3'        |
| mouse PGC-1a4 <sup>[12]</sup> | 5'-TCACACCAAACCCACAGAAA-3'   | 5'-CAGTGTGTGTATGAGGGTTGG-3'          |
| mouse IL10 <sup>[13]</sup>    | 5'-AGTGGAGCAGGTGAAGAGTG-3'   | 5'-TTCGGAGAGAGGTACAAACG-3'           |
| mouse HSP60 <sup>[12]</sup>   | 5'-ACGATCTATTGCCAAGGAGG-3'   | 5'-TCAGGGGTTGTACAGGTTT-3'            |
| mouse HSP90 <sup>[14]</sup>   | 5'-CATCAAGTTGTATGTTCCG-3'    | 5'-GCTCTGAAAGCTTCTTCCG-3'            |
| mouse TGFB1 <sup>[13]</sup>   | 5'-GCTACCATGCCAACTTCTGT-3'   | 5'-CGTAGTAGACGATGGGCAGT-3'           |
| mouse HPRT <sup>[15]</sup>    | 5'-GTCATGCCGACCCGCAGTC-3'    | 5'-GTCCTCCATAATAGTCCATGAGGAATAAAC-3' |

156 **Table1:** Primer pairs used for mRNA determination

## 157 Statistics

158 All values are shown as mean  $\pm$  SEM. One-way ANOVA test, followed by Bonferroni's  
 159 Multiple Comparison Test and two-way unpaired Student's t-test were used. P-values  
 160 <0.05 were considered as significant. The data were analysed with GraphPad Prism  
 161 version 5.0c. The analysis of microarray data was done as stated above.

## 162 References

- 163 1. Charan J, Kantharia ND. How to calculate sample size in animal studies? J  
 164 Pharmacol Pharmacother. 2013;4(4):303-6.
- 165 2. Kadoglou NP, Kostomitsopoulos N, Kapelouzou A, Moustardas P,  
 166 Katsimpoulas M, Giagini A, et al. Effects of exercise training on the severity and  
 167 composition of atherosclerotic plaque in apoE-deficient mice. J Vasc Res.  
 168 2011;48(4):347-56.
- 169 3. Pynn M, Schafer K, Konstantinides S, Halle M. Exercise training reduces  
 170 neointimal growth and stabilizes vascular lesions developing after injury in  
 171 apolipoprotein e-deficient mice. Circulation. 2004;109(3):386-92.
- 172 4. Xu Q, Willeit J, Marosi M, Kleindienst R, Oberhollenzer F, Kiechl S, et al.  
 173 Association of serum antibodies to heat-shock protein 65 with carotid  
 174 atherosclerosis. Lancet. 1993;341(8840):255-9.
- 175 5. Irizarry RA, Hobbs B, Collin F, Beazer-Barclay YD, Antonellis KJ, Scherf U,  
 176 et al. Exploration, normalization, and summaries of high density oligonucleotide  
 177 array probe level data. Biostatistics. 2003;4(2):249-64.
- 178 6. Wu ZI, R.A.; Gentleman, R.; Martinez-Murillo, F.; Spencer, F. A model-  
 179 based background adjustment for oligonucleotide expression arrays. Journal of  
 180 the American Statistical Association. 2004 Dec;99(468):909-17.

- 181 7. Smyth GK. Linear models and empirical bayes methods for assessing  
182 differential expression in microarray experiments. Statistical applications in  
183 genetics and molecular biology. 2004;3:Article3.
- 184 8. Benjamini YH, Y. Controlling the False Discovery Rate: A Practical and  
185 Powerful Approach to Multiple Testing. Jorunal of the Royal Statistical Society.  
186 1995;57(1):289-300.
- 187 9. Huang da W, Sherman BT, Lempicki RA. Systematic and integrative  
188 analysis of large gene lists using DAVID bioinformatics resources. Nature  
189 protocols. 2009;4(1):44-57.
- 190 10. Huang da W, Sherman BT, Lempicki RA. Bioinformatics enrichment tools:  
191 paths toward the comprehensive functional analysis of large gene lists. Nucleic  
192 acids research. 2009;37(1):1-13.
- 193 11. Sturn A, Quackenbush J, Trajanoski Z. Genesis: cluster analysis of  
194 microarray data. Bioinformatics. 2002;18(1):207-8.
- 195 12. Ruas JL, White JP, Rao RR, Kleiner S, Brannan KT, Harrison BC, et al. A  
196 PGC-1alpha isoform induced by resistance training regulates skeletal muscle  
197 hypertrophy. Cell. 2012;151(6):1319-31.
- 198 13. Grundtman C, Jakic B, Buszko M, Onestingel E, Almanzar G, Demetz E, et  
199 al. Mycobacterial heat shock protein 65 (mbHSP65)-induced atherosclerosis:  
200 Preventive oral tolerization and definition of atheroprotective and atherogenic  
201 mbHSP65 peptides. Atherosclerosis. 2015;242(1):303-10.
- 202 14. Database MG. ID MGI: 3051371. Download date: 2017-07-01.
- 203 15. Schuler F, Weiss JG, Lindner SE, Lohmuller M, Herzog S, Spiegl SF, et al.  
204 Checkpoint kinase 1 is essential for normal B cell development and  
205 lymphomagenesis. Nat Commun. 2017;8(1):1697.
- 206
